# Supplementary material
Source: publisher site journal article supplement (http://kjim.org/upload/media/kjim-2018-355-suppl1.pdf)
Supplement: Supplementary file 1 [file kjim-2018-355-suppl1.pdf]

**Supplementary Table 1. Comparison of the 28-item Wisconsin Smoking Withdrawal Scale sorted by subscale between the original and the Korean version**

| The original version                                                                     | The Korean version                        | Subscale      | The Korean version |
|------------------------------------------------------------------------------------------|-------------------------------------------|---------------|--------------------|
| 13. I have been irritable, easily angered.                                               | 13. 나는 짜증이 나고, 쉽게 화가 난다.                  | Anger         | 분노                 |
| 15. I have been bothered by negative moods such as anger, frustration, and irritability. | 15. 나는 화, 우울, 짜증 등의 부정적인 감정 때문에 괴롭다.      |               |                    |
| 18. I have felt frustrated.                                                              | 18. 나는 좌절감을 느낀다.                          |               |                    |
| 3. I have been tense or anxious.                                                         | 3. 나는 긴장되거나 불안하다.                         | Anxiety       | 불안                 |
| 6. I have felt impatient.                                                                | 6. 나는 참을성이 없다.                            |               |                    |
| 8. I have found myself worrying about my problems.                                       | 8. 나는 내 문제에 대해 걱정이 많다.                    |               |                    |
| 10. I have felt calm lately. <sup>a</sup>                                                | 10. 나는 최근 침착하다. <sup>a</sup>              | Concentration | 주의집중               |
| 4. My level of concentration is excellent. <sup>a</sup>                                  | 4. 나의 집중력은 우수하다. <sup>a</sup>             |               |                    |
| 23. It is hard to pay attention to things.                                               | 23. 나는 집중하기 어렵다.                          |               |                    |
| 27. It has been difficult to think clearly                                               | 27. 나는 명확하게 생각하는 것이 힘이 든다.                | Craving       | 갈망                 |
| 9. I have had frequent urges to smoke.                                                   | 9. 나는 자주 담배 충동을 느끼곤 한다.                   |               |                    |
| 11. I have been bothered by the desire to smoke a cigarette.                             | 11. 나는 담배를 피우고 싶은 마음 때문에 성가시다.            |               |                    |
| 20. I have thought about smoking a lot.                                                  | 20. 나는 담배에 대해 자주 생각한다.                    | Hunger        | 공복                 |
| 26. I have trouble getting cigarettes off my mind.                                       | 26. 나는 담배에 대한 생각을 떨쳐내기가 힘들다.              |               |                    |
| 1. Food is not particularly appealing to me. <sup>a</sup>                                | 1. 나는 입맛이 없다. <sup>a</sup>                |               |                    |
| 14. I want to nibble on snacks or sweets.                                                | 14. 나는 과자나 군것질거리를 먹고 싶다.                  | Sadness       | 우울                 |
| 16. I have been eating a lot.                                                            | 16. 나는 최근 많이 먹는다.                         |               |                    |
| 21. I have felt hungry.                                                                  | 21. 나는 배고픔을 느낀다.                          |               |                    |
| 28. I think about food a lot.                                                            | 28. 나는 음식에 대한 생각을 자주 한다.                  | Sleep         | 수면                 |
| 7. I have felt upbeat and optimistic. <sup>a</sup>                                       | 7. 나는 긍정적이고 낙관적이다. <sup>a</sup>           |               |                    |
| 12. I have felt sad or depressed.                                                        | 12. 나는 슬프거나 우울하다.                         |               |                    |
| 19. I have felt hopeless or discouraged.                                                 | 19. 나는 낙담하거나 희망이 없는 것처럼 느낀다.              | Sleep         | 수면                 |
| 24. I have felt happy and content. <sup>a</sup>                                          | 24. 나는 행복하고 만족한다. <sup>a</sup>            |               |                    |
| 2. I am getting restful sleep. <sup>a</sup>                                              | 2. 나는 편안한 숙면을 취한다. <sup>a</sup>           |               |                    |
| 5. I awaken from sleep frequently during the night.                                      | 5. 나는 밤에 자다가 자주 깬다.                       | Sleep         | 수면                 |
| 17. I am satisfied with my sleep. <sup>a</sup>                                           | 17. 나는 나의 수면에 만족한다. <sup>a</sup>          |               |                    |
| 22. I feel that I am getting enough sleep. <sup>a</sup>                                  | 22. 나는 충분한 양의 수면을 취한다고 생각한다. <sup>a</sup> |               |                    |
| 25. My sleep has been troubled.                                                          | 25. 나는 수면을 잘 취하지 못한다.                     |               |                    |

<sup>a</sup>These items are reverse scored.
